# Supplementary material for: Integrative Analyses of Uterine Transcriptome and MicroRNAome Reveal Compromised LIF-STAT3 Signaling and Progesterone Response in the Endometrium of Patients with Recurrent/Repeated Implantation Failure (RIF)
Source: PLoS One. 2016 Jun 15;11(6):e0157696. doi: 10.1371/journal.pone.0157696 (PMC4909214; doi:10.1371/journal.pone.0157696)
Supplement: S1 Table — (XLSX) [file pone.0157696.s002.xlsx]

## Sheet: Table Primer
Gene name	Primer	Sequence (5' → 3')
S100P	S100P_F	AAGGATGCCGTGGATAAATTGC
	S101P_R	ACACGATGAACTCACTGAAGTC
CXCL13	CXCL13_F	GCTTGAGGTGTAGATGTGTCC
	CXCL13_R	CGATCAATGAAGCGTCTAGGGAT
LYPD3	LYPD3_F	GATGCTCCCCGAACAAGATGA
	LYPD3_R	CAGCGAGAATTGTCCGTGGAT
SIX1	SIX1_F	CTGCCGTCGTTTGGCTTTAC
	SIX1_R	GCTCTCGTTCTTGTGCAGGT
FXYD3	FXYD3_F	CCTGAAATTGTACCAGCGGCAA
	FXYD3_R	GCTGCCACGCCCTAAGCAAAC
DNER	DNER_F	AAGGCTATGAAGGTCCCAACT
	DNER_R	CTGAGAGCGAGGCAGGATTT
DHCR24	DHCR24_F	GTGAAACACTTTGAAGCCAGG
	DHCR24_R	AGCCATCAAACATCTCCCAG
SLC29A2	SLC29A2_F	CACCTACAGCACCCTCTTC
	SLC29A2_R	GCGTGATAAAGTACCCCAGG
DDX23	DDX23_F	ATTGGGCTACAGAATCGTGAC
	DDX23_R	CCTTGGTCTGACTCTTCGATC
XBP1	XBP1_F	CCCTCCAGAACATCTCCCCAT
	XBP1_R	ACATGACTGGGTCCAAGTTGT
RHOU	RHOU_F	GCTACCCCACCGAGTACATC
	RHOU_R	GGCTCACGACACTGAAGCA
ST3GAL1	ST3GAL1_F	GGAGGACGACACCTACCGAT
	ST3GAL1_R	CCACCGACCTCTTCTCCAG
STAT3	STAT3_F	ATCACGCCTTCTACAGACTGC
	STAT3_R	CATCCTGGAGATTCTCTACCACT
IL19	IL19_F	GGCTCCTGGGTACAATACTGA
	IL19_R	GGTGTCCTTAGCTTGGATGGC
IL4R	IL4R_F	CGTGGTCAGTGCGGATAACTA
	IL4R_R	TGGTGTGAACTGTCAGGTTTC
OSM	OSM_F	CACAGACTGGCCGACTTAGAG
	OSM_R	AGTCCTCGATGTTCAGCCCA
BCL2A1	BCL2A1_F	AGTGCTACAAAATGTTGCGTTC
	BCL2A1_R	GGCAATTTGCTGTCGTAGAAGTT
EPB41L4B	EPB41L4B_F	TTGGACCTGCTTATGCTTTACAC
	EPB41L4B_R	AGCTCCGCTTGTAGACAGAGA
PTP4A	PTP4A_F	GGCGTGGAGCTTTTAACAGC
	PTP4A_R	GCCGCATTTTAGGACGATACTT
SIRT1	SIRT1_F	AAGTTGACTGTGAAGCTGTACG
	SIRT1_R	TGCTACTGGTCTTACTTTGAGGG
ATP1A1	ATP1A1_F	TGTTACTGTGGATTGGAGCG
	ATP1A1_R	CAACCAGTTATGATTACAACGGC
TPD52L1	TPD52L1_F	TGTTGGAGACTGAACCGTTG
	TPD52L1_R	CTTGTCGTAGTGTTGTAATTTCGTC
PTK2	PTK2_F	GGAGTATGTCCCTATGGTGAAG
	PTK2_R	CCCAGGTCAGAGTTCAATAGC
ESR1	ESR1_F	CCCACTCAACAGCGTGTCTC
	ESR1_R	CGTCGATTATCTGAATTTGGCCT
PGR	PGR_F	GACACCTTGCCTGAAGTTTCG
	PGF_R	CTGCGTCTTTTCGTCGGAG
